# Supplementary material for: Shape-controlled hydrothermal synthesis of superhydrophobic and superoleophilic BaMnF4micro/nanostructures
Source: Royal Society of Chemistry journal article supplement (doi:10.1039/c5ce02502h), 2016-01-01
Supplement: c5ce02502h3.pdf [file c5ce02502h3.pdf]

# Shape-controlled hydrothermal synthesis of superhydrophobic and superoleophilic BaMnF<sub>4</sub> micro/nanostructures

Yong Chen, Feng Li\*, Taohai Li, Wei Cao

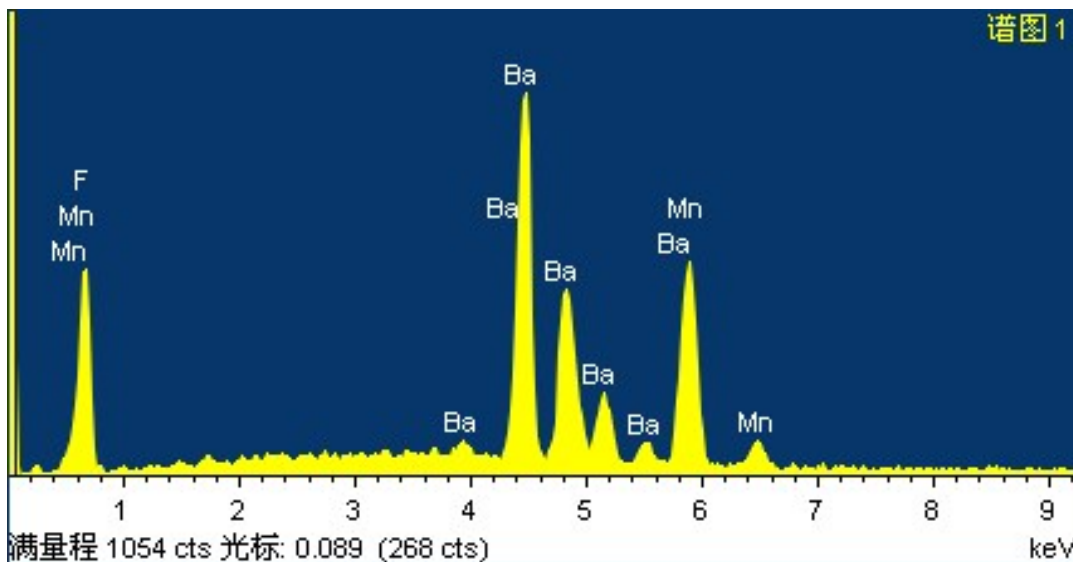

Figure S1. the EDS patterns of the samples prepared via hydrothermal method under pH=4 at 160 °C for 24 h.

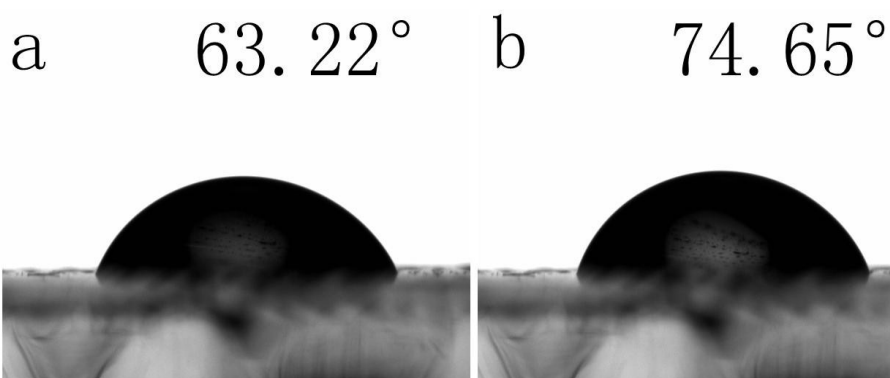

Figure S2. CAs of water droplets on the surfaces of different glass. (a) none, (b) modified by stearic acid.

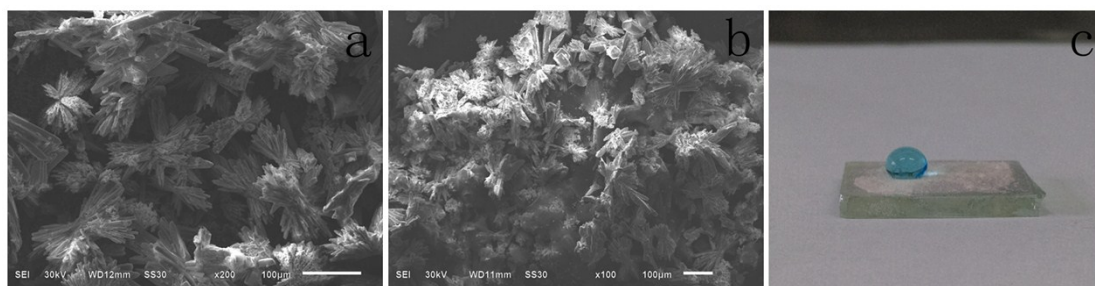

Figure S3. SEM images of the films (a) before ultrasonic concussion (b) after

ultrasonic concussion, (c) photo of a water droplet on the film after ultrasonic concussion.

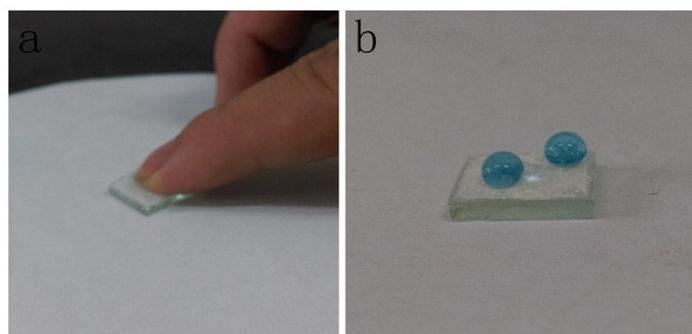

Fig. S4. (a) The  $\text{BaMnF}_4$  surface remained superhydrophobic upon being touched by a finger, and (b) water droplets exhibited spherical shape on the touched fabric surface.
